# Supplementary material for: Colletotrichum Species Associated with Japanese Plum (Prunus salicina) Anthracnose in South Korea
Source: PubMed Central journal article supplement (PMC6700192; doi:10.1038/s41598-019-48108-1), 2019-08-19
Supplement: 41598_2019_48108_MOESM1_ESM.pdf [file 41598_2019_48108_MOESM1_ESM.pdf]

***Colletotrichum* Species Associated with Japanese Plum (*Prunus salicina*)  
Anthracnose in South Korea**

Oliul Hassan<sup>1</sup>, Yong Se Lee<sup>2</sup> and Taehyun Chang<sup>1\*</sup>

<sup>1</sup> Department of Ecology & Environmental System, College of Ecology & Environmental Sciences, Kyungpook National University, Sangju, Gyeongbuk 37224, Korea (Republic of)

<sup>2</sup> Division of Life and Environmental Sciences, College of Life and Environmental Sciences, Daegu University, Gyeongsan, Gyeongbuk 38453, Korea (Republic of)

**\*Corresponding Author:** Tel: +82 54 530 1204, Fax: +82-54-530-1209, E-mail:  
thchang@knu.ac.kr

## Appendices legends

Appendix 1: Maximum likely hood tree based on AptMat sequence alignment.

Appendix 2: The results of the pairwise homoplasy index (PHI) test of closely related species using both LogDet transformation and splits decomposition. PHI test results ( $\Phi_w$ ) < 0.05 indicate significant recombination within the dataset.

Appendix 1:

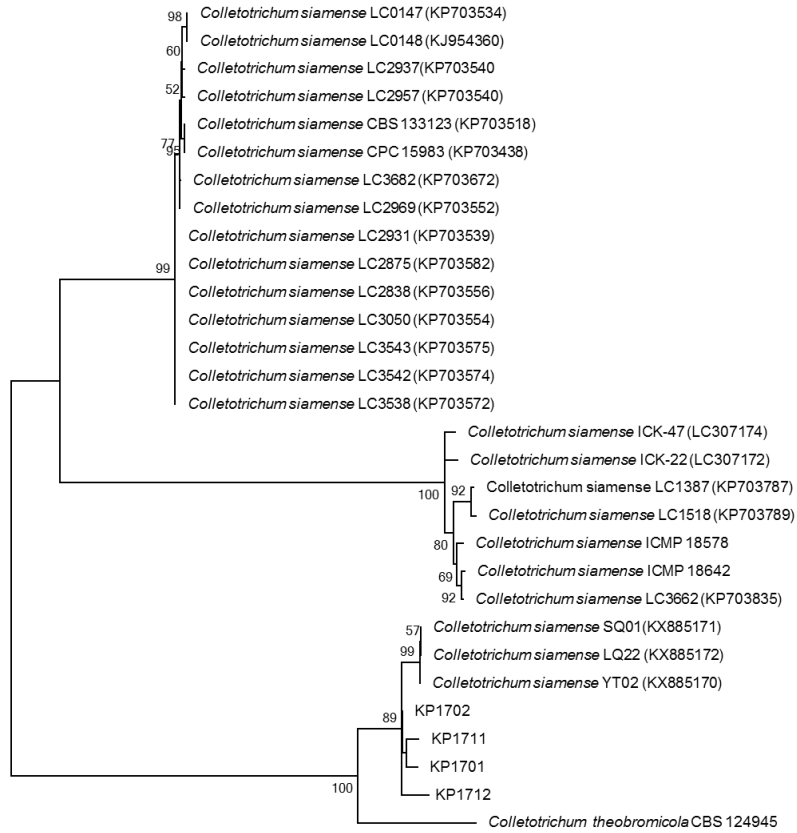

*Colletotrichum siamense*

0.1

Appendix -2:

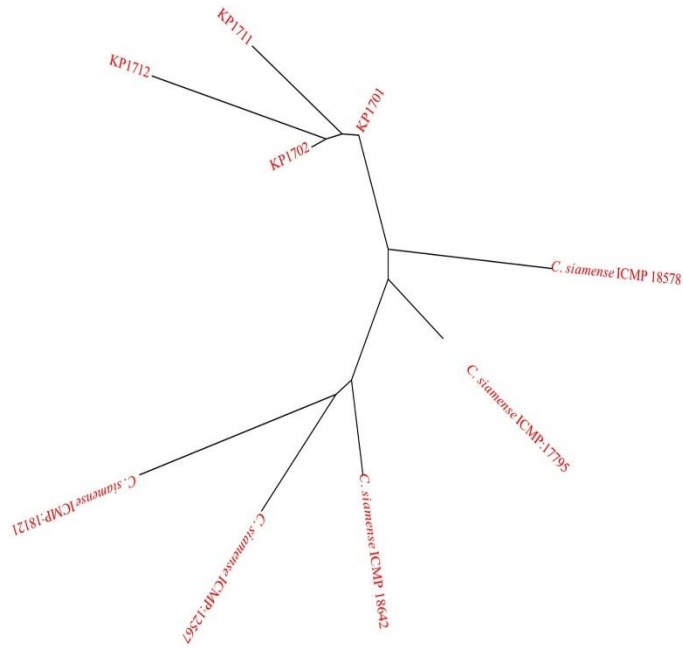

0.0005  
a  $\Phi_w = < 0.001$

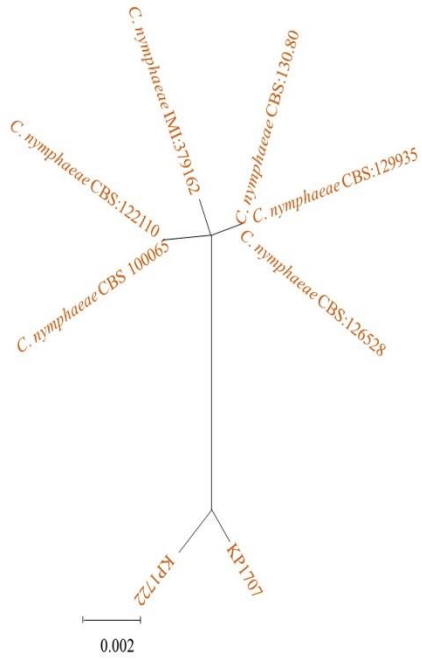

0.002  
c  $\Phi_w = < 0.02$

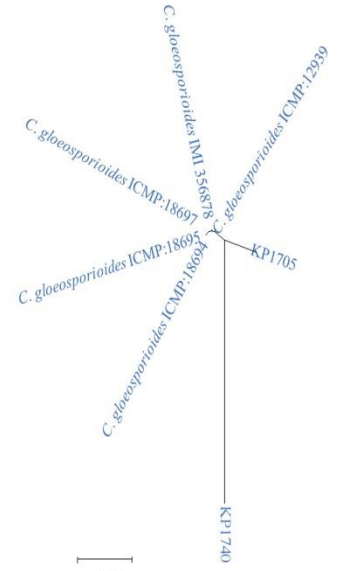

0.01  
b  $\Phi_w = 0.003$

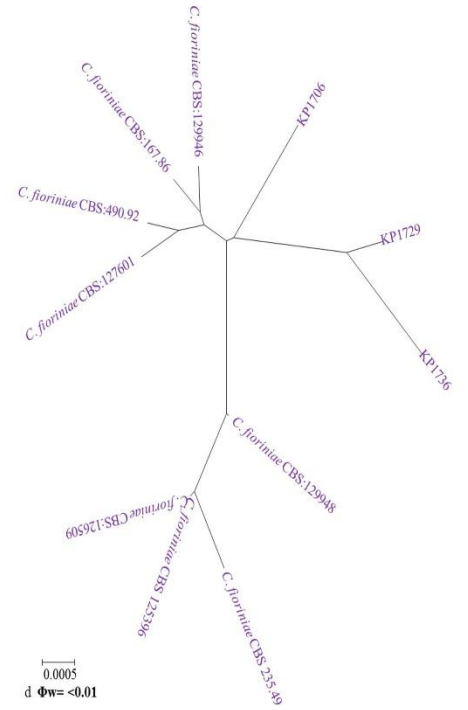

0.0005  
d  $\Phi_w = < 0.01$
